# Supplementary material for: Mechano-induced photoluminescence colour change in an alkyltolane-terminated cyanostilbene
Source: Royal Society of Chemistry journal article supplement (doi:10.1039/d1ce00456e), 2021-01-01
Supplement: d1ce00456e1.pdf [file d1ce00456e1.pdf]

Supporting Information

**Mechano-induced photoluminescence colour change in an alkyltolane-terminated cyanostilbene**

Mizuho Kondo\*, Yuya Morita, Jun-ichi Nishida, Takeshi Kawase and Nobuhiro Kawatsuki\*

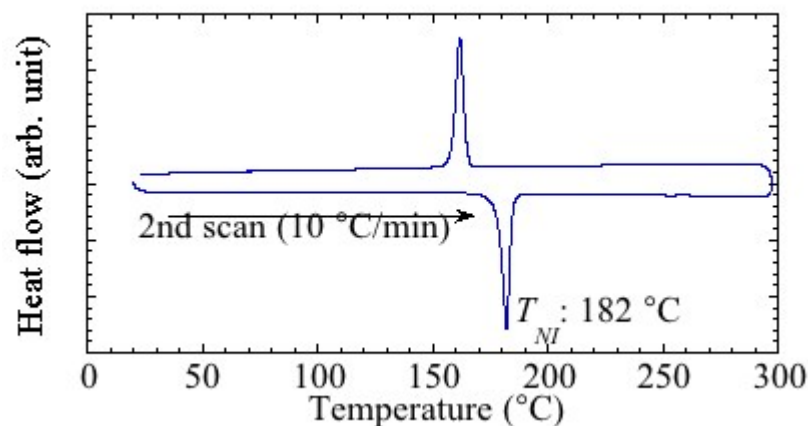

**Figure S1.** Differential scanning calorimetry thermogram of crystalline **2ECN**.

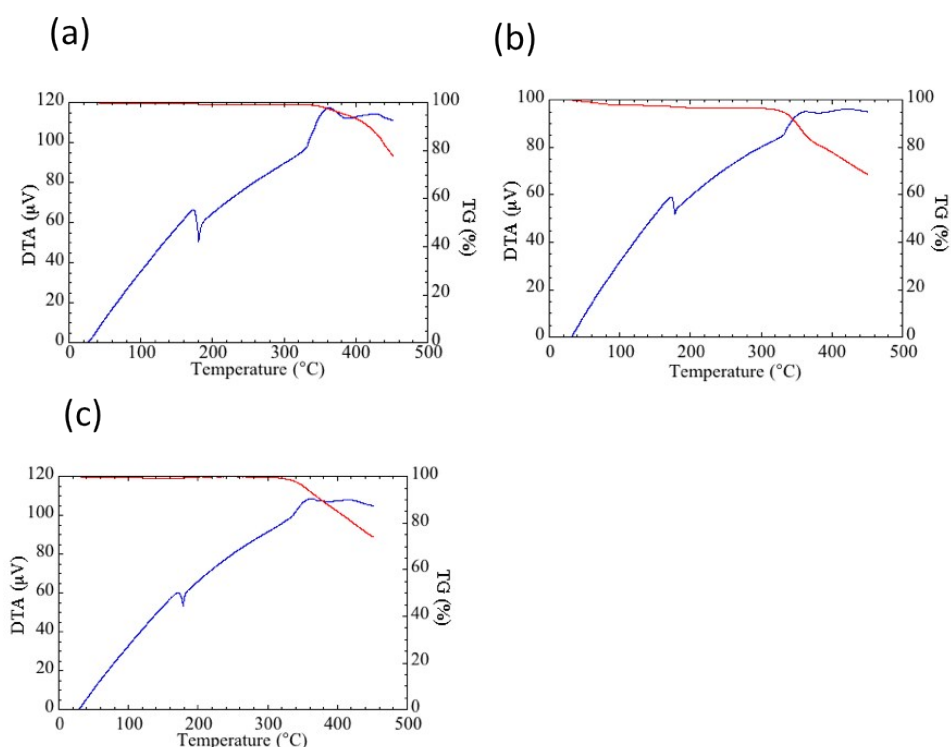

**Figure S2.** Thermogravimetry (TG)/differential thermal analysis (DTA) curves of **2ECN** recorded for (a) crystals, (b) blue-shifted powder, and (c) yellow-shifted powder.

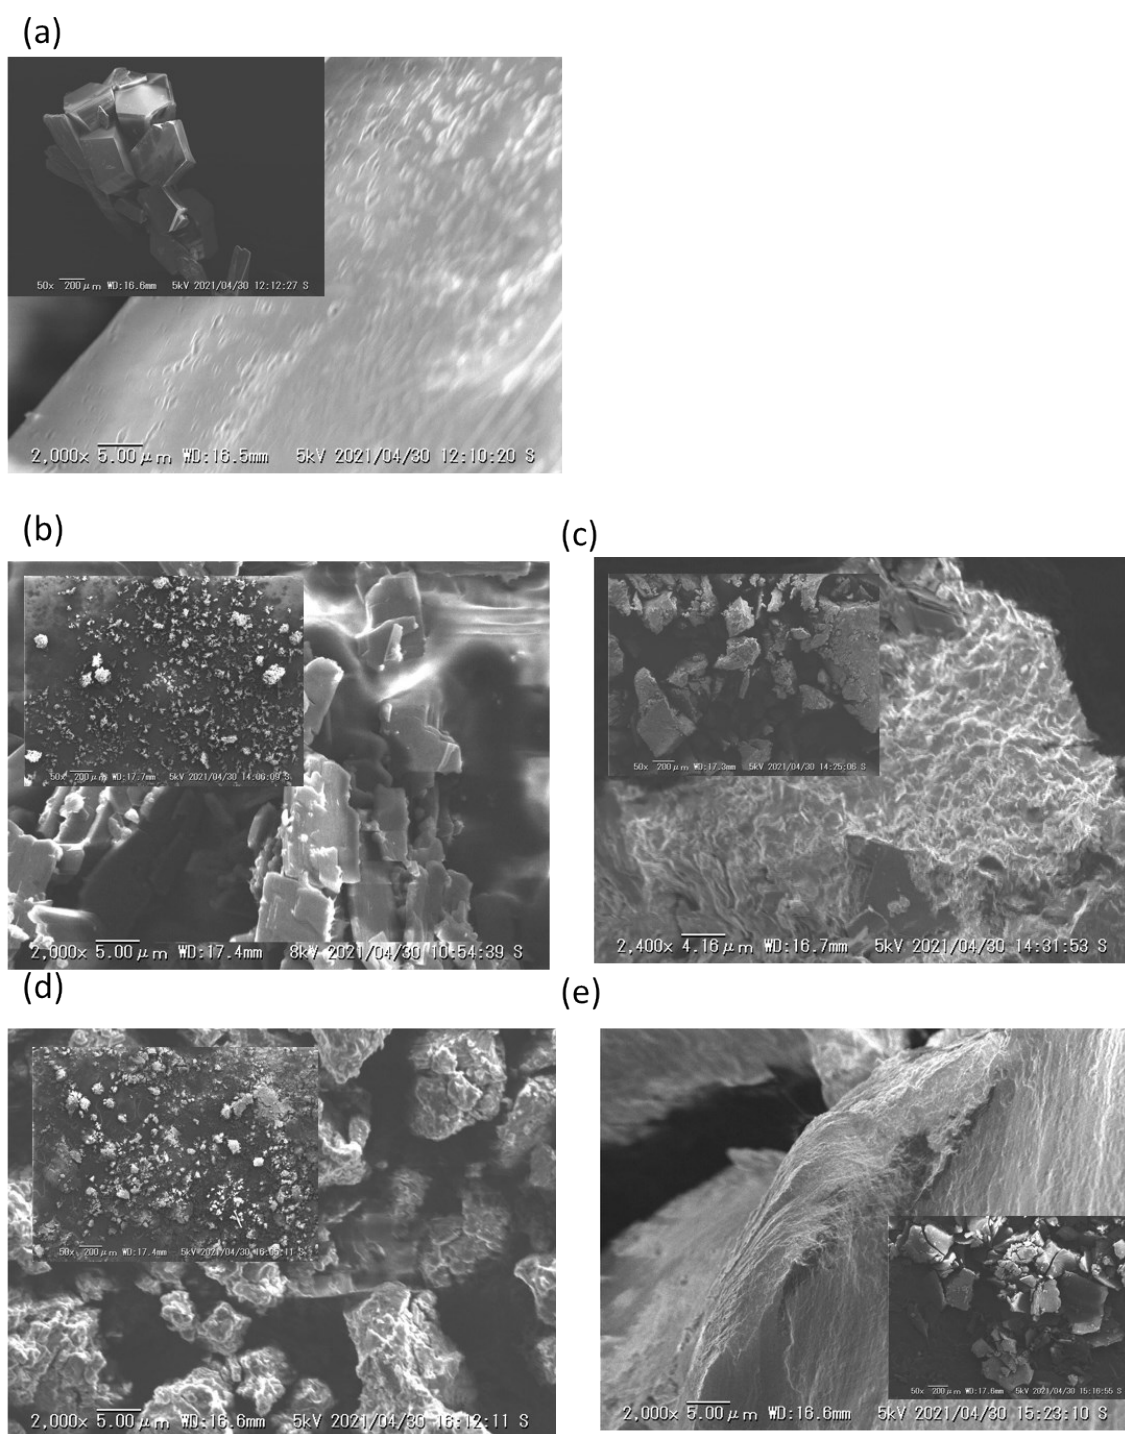

**Figure S3.** High-magnification (SEM images of **2ECN** in the forms of (a) crystals, (b) blue-shifted powder before grinding, (c) yellow-shifted powder before grinding, (d) blue-shifted powder after grinding, (e) yellow-shifted powder after grinding. Insets present low-magnification images.

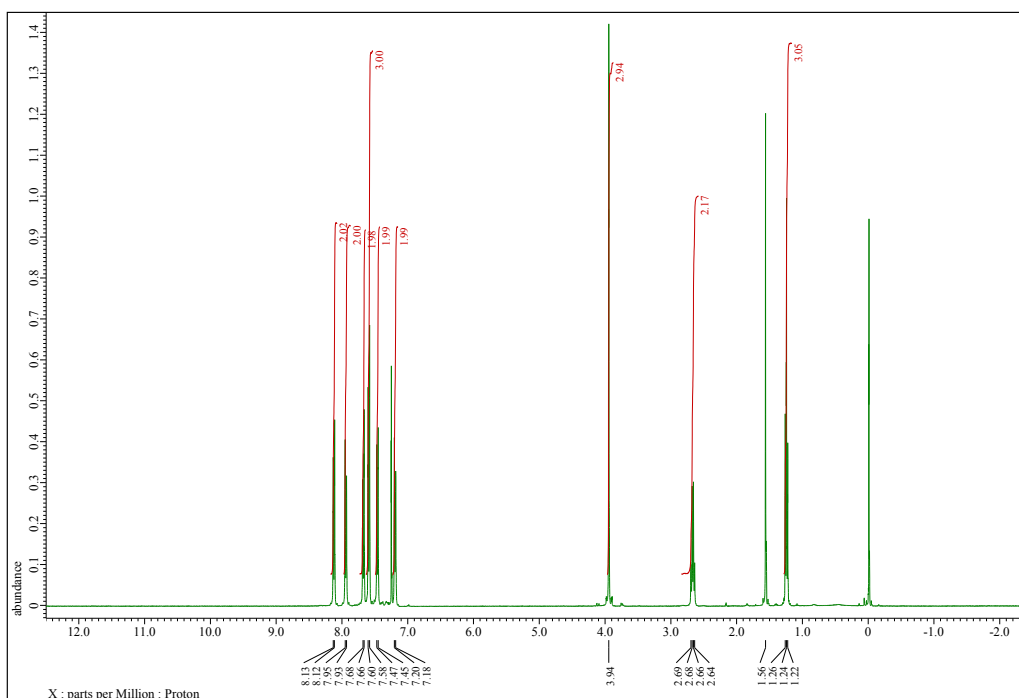

**Figure S4.**  $^1\text{H}$  NMR spectrum of **2**.

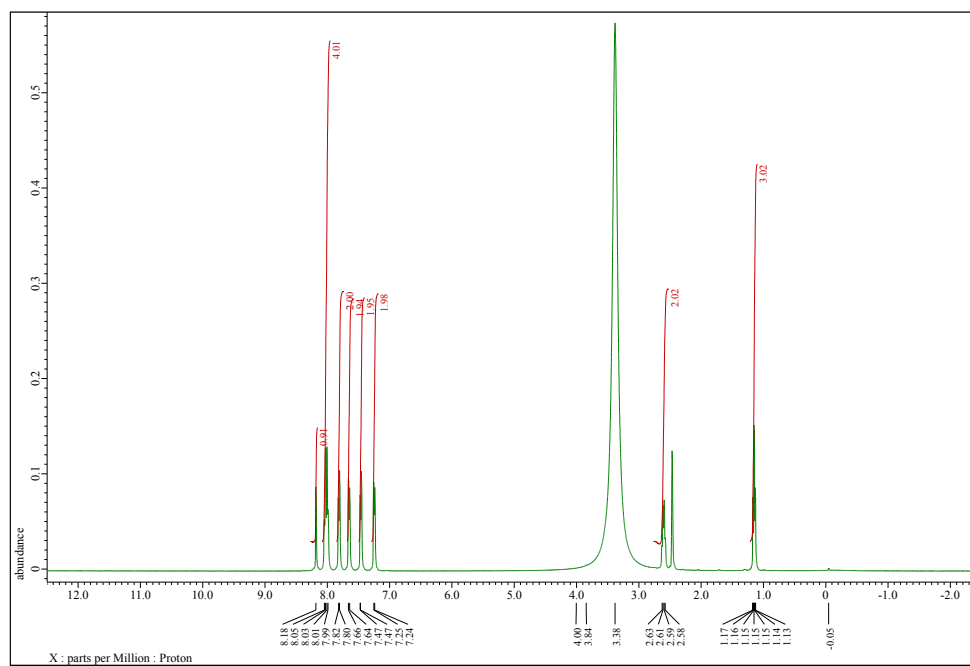

**Figure S5.**  $^1\text{H}$  NMR spectrum of **3**.

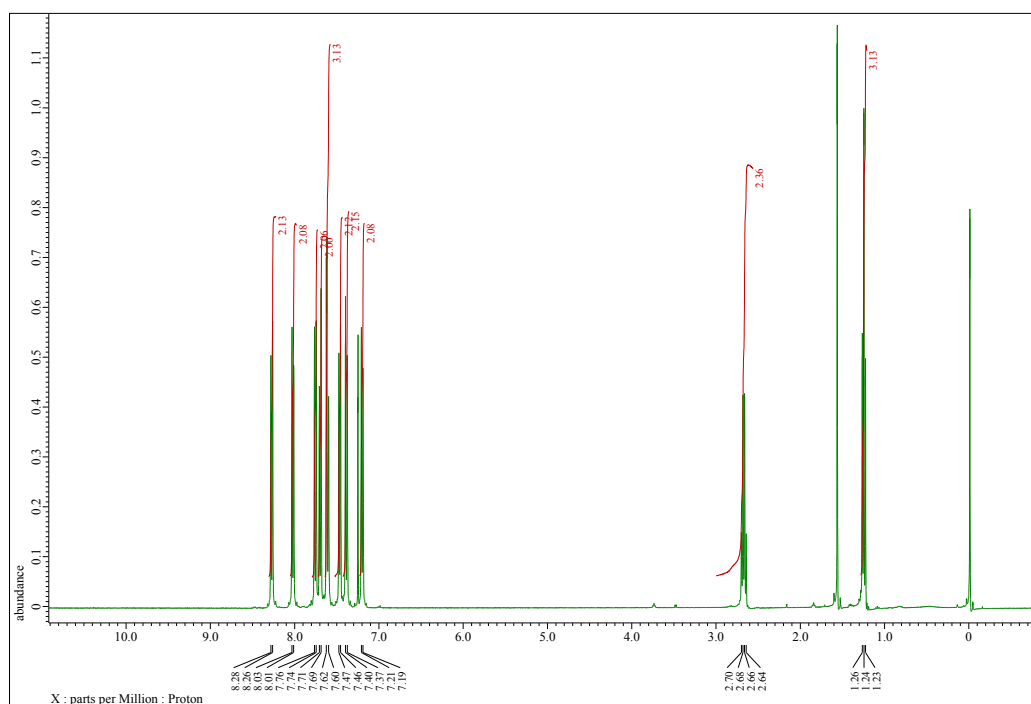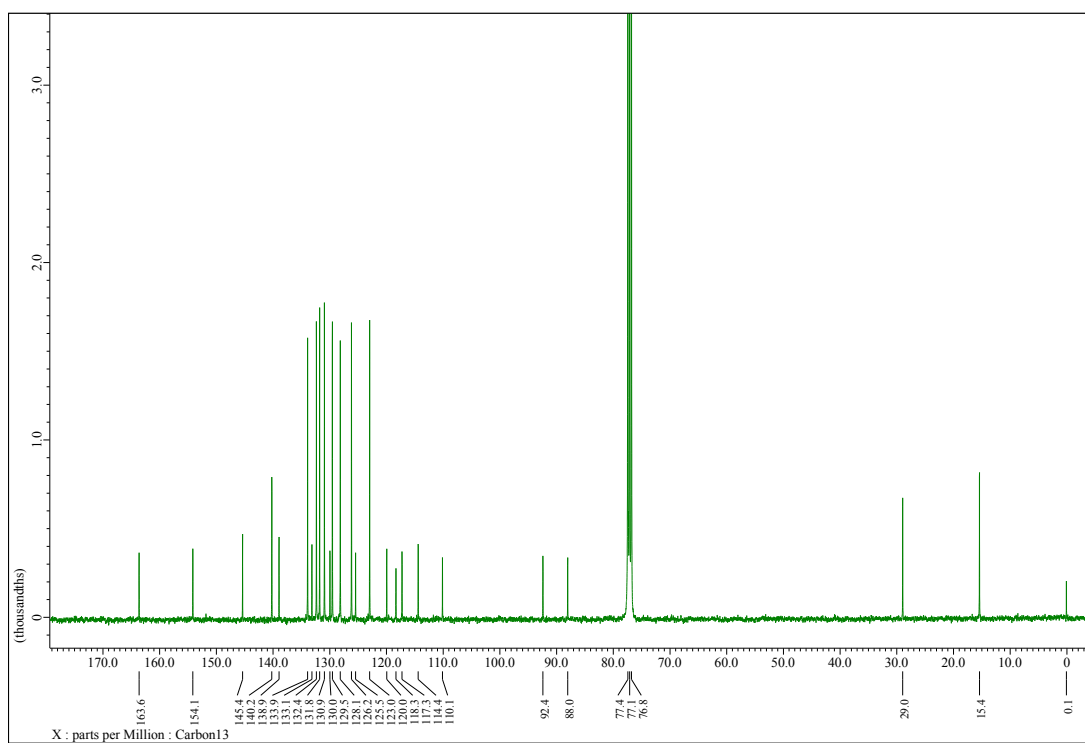

Figure S6.  $^1\text{H}$  (top) and  $^{13}\text{C}$  (bottom) NMR spectra of 2ECN.
